# Supplementary material
Source: PubMed Central journal article supplement (PMC9170188)

# Supplement Figure S1

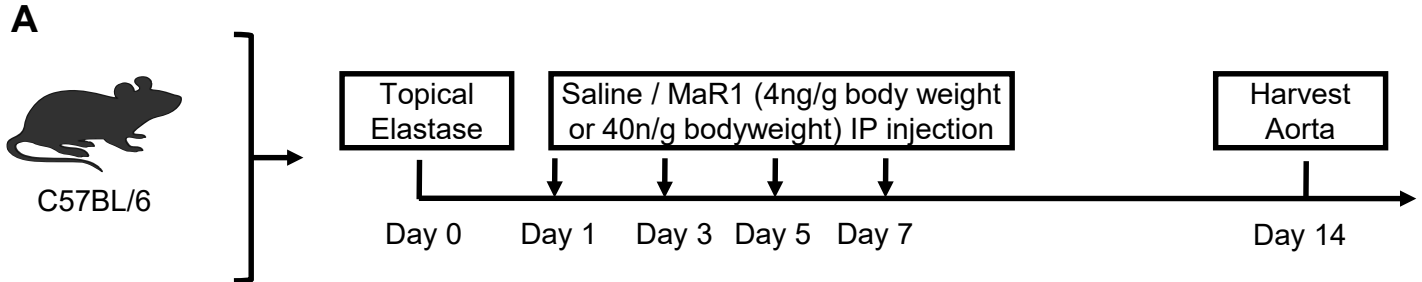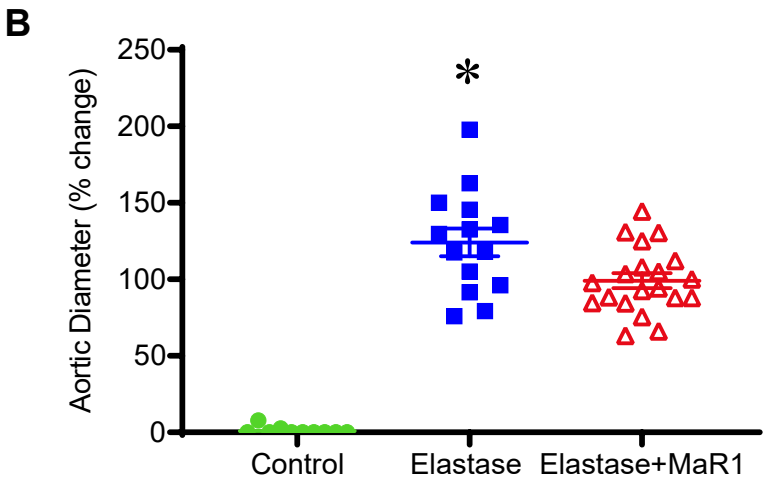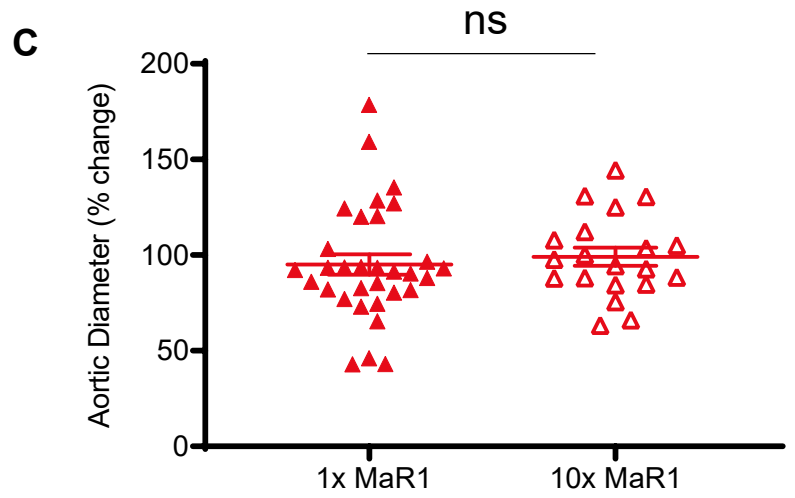

# Supplement Figure S2

**A**

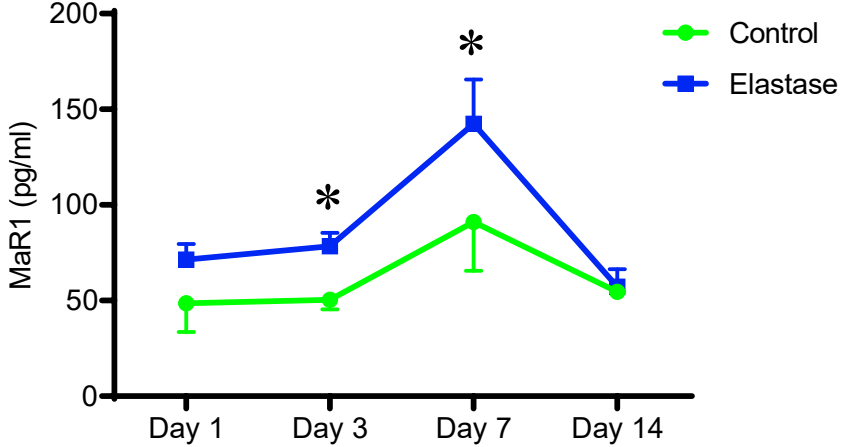

**B**

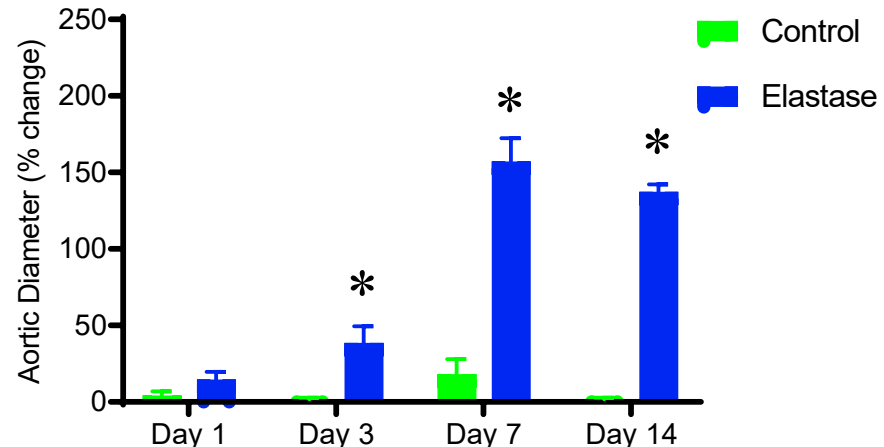

**C**

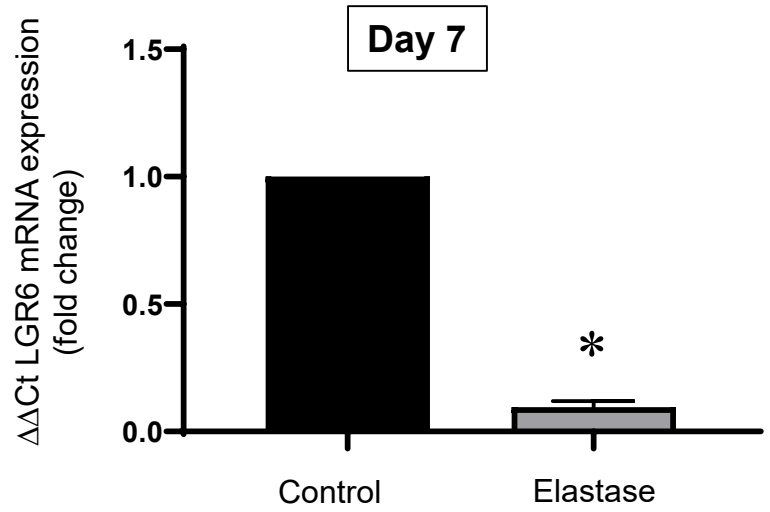

**D**

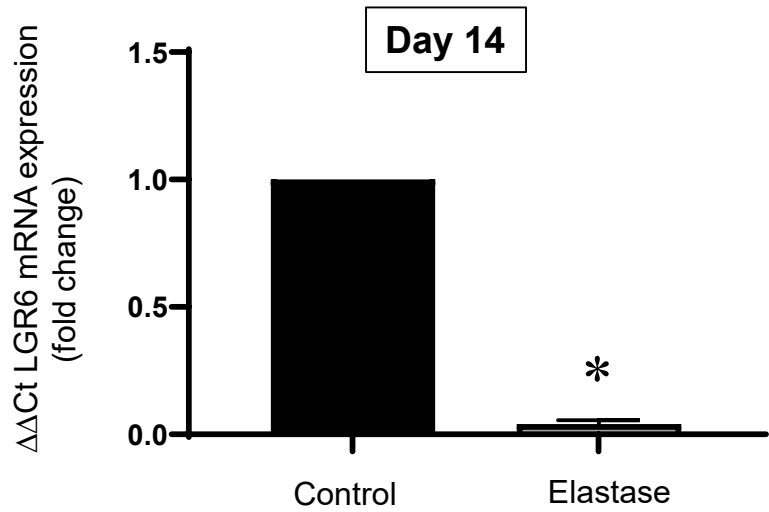

Supplement Figure S3

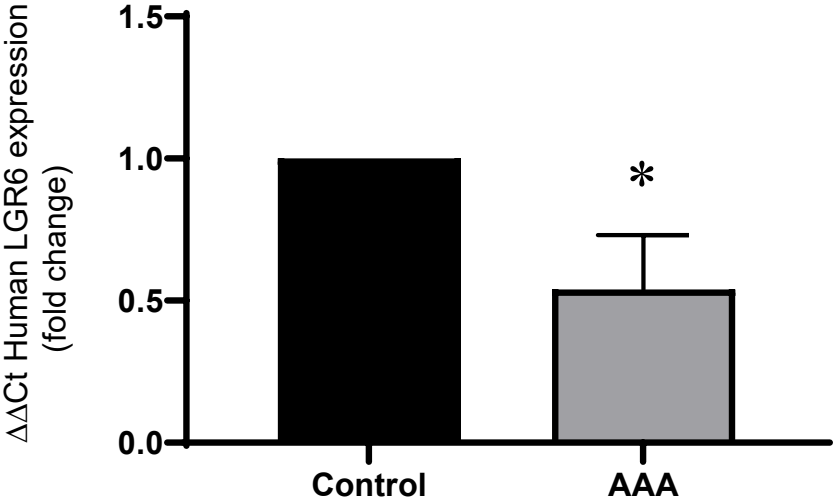

# Supplement Figure S4

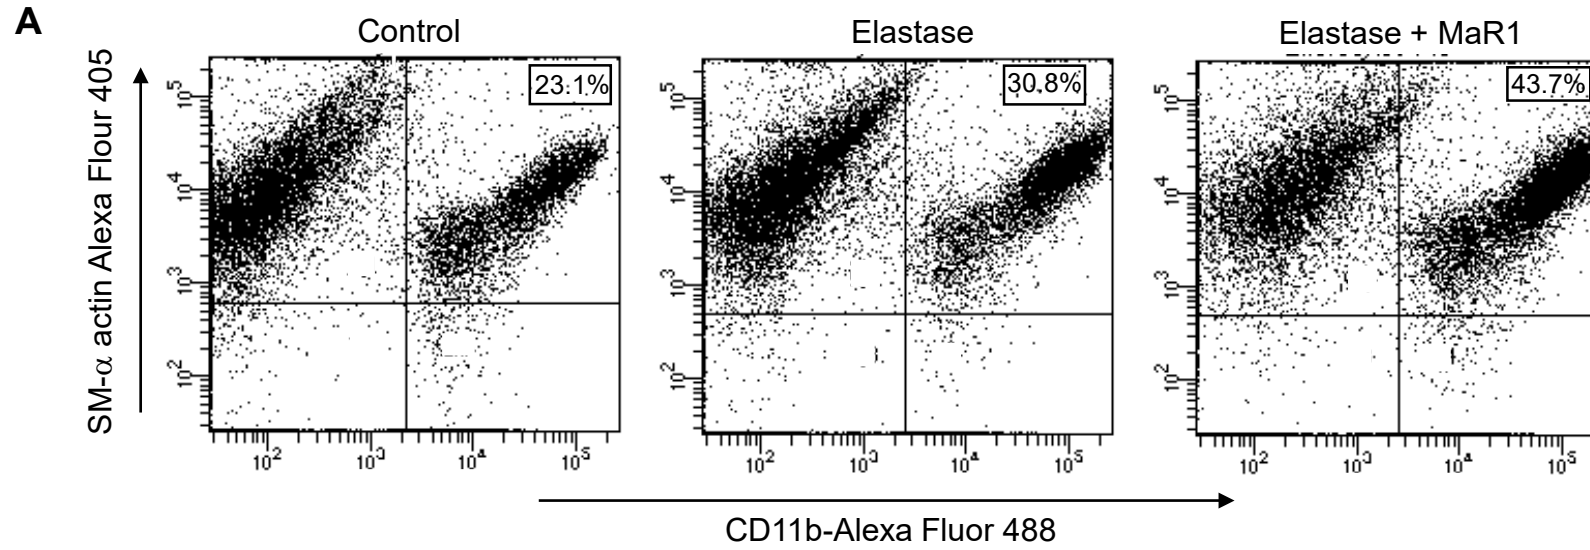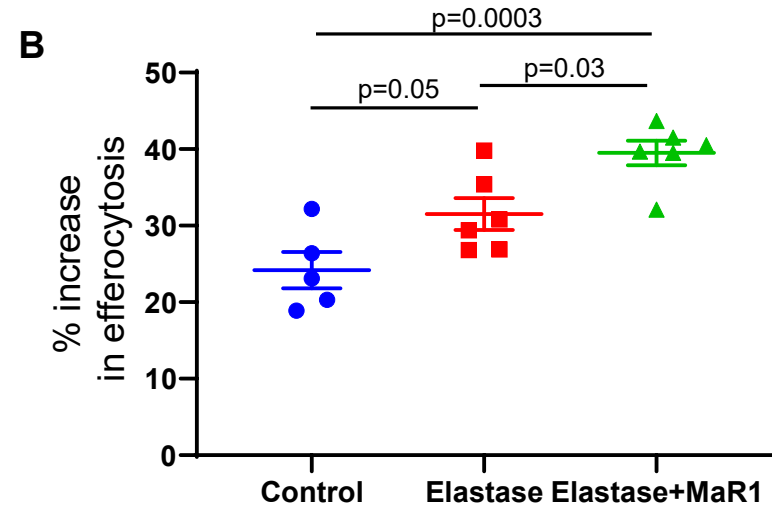

Supplement: NIHMS1809474-supplement-1.pdf [file NIHMS1809474-supplement-1.pdf]
